# Supplementary material for: Holistic monitoring of Campylobacter jejuni biofilms with NanoLuc bioluminescence
Source: PubMed Central journal article supplement — Appl Microbiol Biotechnol. 2024 Dec 28;108(1):546. doi: 10.1007/s00253-024-13383-0 (PMC11682011; doi:10.1007/s00253-024-13383-0), 2024-12-28
Supplement: 253_2024_13383_MOESM1_ESM.pdf [file 253_2024_13383_MOESM1_ESM.pdf]

# Applied Microbiology and Biotechnology

## Supplementary data

### Holistic monitoring of *Campylobacter jejuni* biofilms with NanoLuc bioluminescence

Tjaša Čukajne<sup>1</sup>, Petra Štravs<sup>2</sup>, Orhan Sahin<sup>3</sup>, Qijing Zhang<sup>4</sup>, Aleš Berlec<sup>2,5</sup>, Anja Klančnik<sup>1,\*</sup>

<sup>1</sup>Biotechnical Faculty, Department of Food Science and Technology, University of Ljubljana, Ljubljana, Slovenia

<sup>2</sup>Jožef Stefan Institute, Department of Biotechnology, Ljubljana, Slovenia

<sup>3</sup>College of Veterinary Medicine, Department of Veterinary Diagnostic and Production Animal Medicine, Iowa State University, Ames, Iowa, USA

<sup>4</sup>College of Veterinary Medicine, Department of Veterinary Microbiology and Preventive Medicine, Iowa State University, Ames, Iowa, USA

<sup>5</sup>Faculty of Pharmacy, Chair of Pharmaceutical Biology, University of Ljubljana, Ljubljana, Slovenia

#### Corresponding author:

Anja Klančnik

Tel.: +386 1 3203 762

E-mail address: [anja.klancnik@bf.uni-lj.si](mailto:anja.klancnik@bf.uni-lj.si)

ORCID: 0000-0003-1632-5785

A

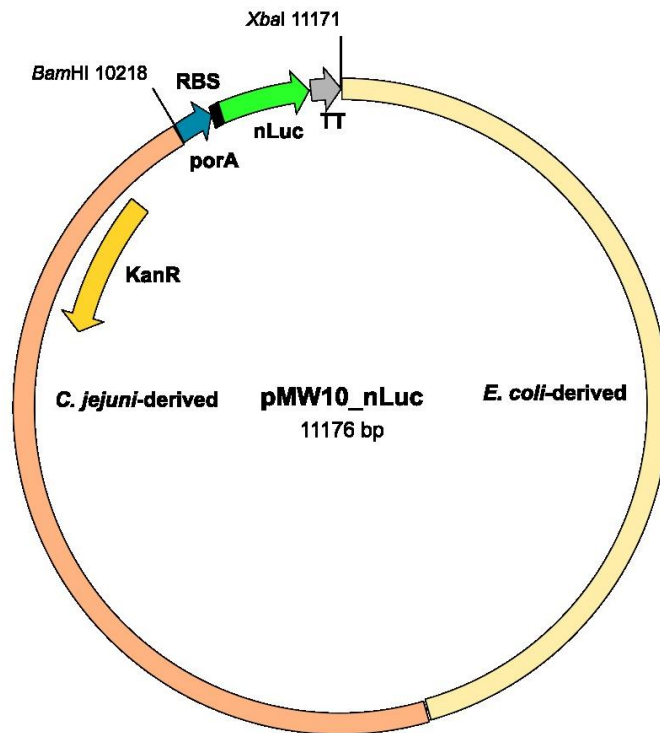

B

>PporA\_nLuc\_TT

```

TTTAAAACAAC TATATATTACTTCTCGTTTACTTTTTAGGCTTATACTTCTAAACGAACCGAAAAAC
ATTCATAAGAAAAC TCTTAAAATTACACGCCTAGCTTAAATCCCTTTAGCTAGGCTTTTCTTTAG
ATGTTTTTATCCTTCGGATTTAAAATTTTTACTATTTTAAAGTGCTTCTTAAGAAAAAACTCCAATT
TATGTGCTACAATTACGATGTTTTATTAATTTTTGACAAGGAGAATTCCCATGGTTTTTACACTTGA
AGATTTTGTGGGTGATTGGAGGCAAACAGCAGGATATAATTTGGATCAAGTTTTAGAGCAAGGAG
GAGTGTCTTCTTTATTTCAAAAATTTAGGCGTCAGTGTAACGCCTATTCAAAGGATCGTGTTATCAGG
CGAGAATGGTTTGAAAATTGATATTCATGTTATAATTCCTTATGAAGGTCTTTCAGGAGATCAAAT
GGGTCAAATTGAAAAGATATTTAAAGTTGTATATCCTGTTGATGACCATCATTTTAAAGTGATATT
ACATTATGGCACTTTAGTTATTGATGGAGTTACACCTAATATGATTGATTATTTTGGTAGACCTTAT
GAGGGAATAGCTGTTTTGATGGTAAGAAGATTACGGTTACGGGCACTCTATGGAATGGGAATAA
AATTATTGATGAAAGATTAATCAATCCCGATGGCAGTCTACTATTTAGAGTTACTATTAATGGAGT
AACAGGTTGGAGACTTTGTGAGAGAATATTGGCCTAACTCGAGATTCCAGGCATCAAATAAAAACG
AAAGGCTCAGTCGAAAGACTGGGCCTTTCGTTTTATCTGTGTTTGTTCGGTGAACGCTCTCCTGAGT
AGGACAAATCCGCCGGGAGCGGATTTGAACGTTGCGAAGCAACGGCCCGGAGGGTGGCGGGCAG
GACGCCCGCCATAAACTGCCA
  
```

**SUPPLEMENTARY FIGURE S1** | Schematic of the pMW10\_nLuc plasmid (A) and nucleotide sequence of the codon optimized for the nLuc gene (green) with porA promoter (blue) and terminator (grey) (B). KanR, kanamycin resistance gene; TT, transcription terminator; RBS, ribosome-binding site.

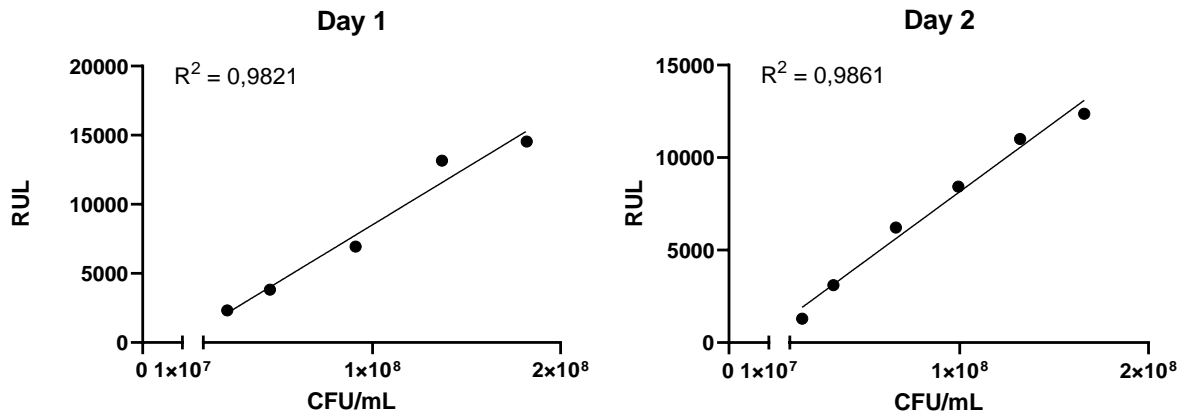

**SUPPLEMENTARY FIGURE S2** | Calibration curves for the NanoLuc bioluminescence assay from two separate days.

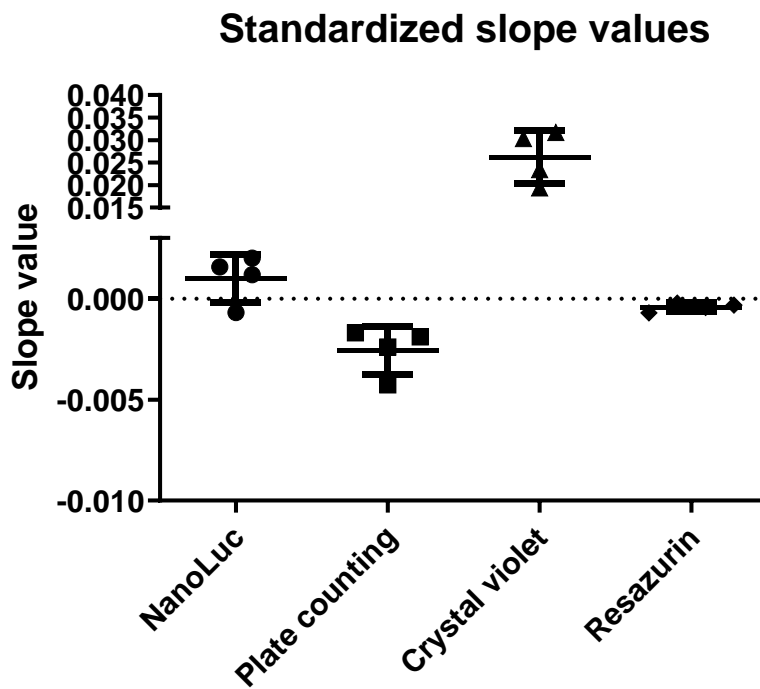

**SUPPLEMENTARY FIGURE S3** | The relationship between assessed bioluminescence (NanoLuc), CFU (plate counting assay), absorbance (crystal violet) and fluorescence (resazurin) and incubation time. The slope values were standardized based on the average value for each method.

**SUPPLEMENTARY TABLE S1** | ANOVA analysis to test whether significant changes in biofilm formation occurred as a function of initial inoculum concentration or incubation time.

|                      | <b>Plate counting<br/>(CFU/ml)</b> | <b>NanoLuc<br/>bioluminescence assay</b> | <b>Crystal violet assay</b> | <b>Resazurin</b> |
|----------------------|------------------------------------|------------------------------------------|-----------------------------|------------------|
| <b>Time</b>          | 0.2009                             | 0.2355                                   | <b>0.003735 **</b>          | <b>0.02325 *</b> |
| <b>Concentration</b> | 0.8234                             | 0.2734                                   | 0.336190                    | <b>0.05002 .</b> |

Significance codes: (0.001, 0.01] ‘\*\*\*’ (0.01, 0.05] ‘\*\*’ (0.05, 0.1] ‘.’
